# Supplementary material for: Phase-effect of Bi 2 O 3 in photocatalytic degradation of 2-chlorophenol via a preferential dechlorination pathway
Source: Royal Society of Chemistry journal article supplement (doi:10.1039/d5nj04273a), 2025-12-30
Supplement: d5nj04273a1.pdf [file d5nj04273a1.pdf]

## Phase-effect of $\text{Bi}_2\text{O}_3$ in photocatalytic degradation of o-chlorophenol via a preferential dechlorination pathway

Xingyu Jin<sup>a</sup>, Ying Wang<sup>a</sup>, Limin Wang<sup>a</sup>, Rui Yan<sup>a,b\*</sup>, Ekaterina Kozlova<sup>c</sup>, Zhijun Li<sup>a</sup>, Binhong Qu<sup>a</sup>, Yang Qu<sup>a\*</sup> and Liqiang Jing<sup>a</sup>

<sup>a</sup>.Key Laboratory of Functional Inorganic Materials Chemistry (Heilongjiang University), Ministry of Education, School of Chemistry and Materials Science, International Joint Research Center for Catalytic Technology, Harbin 150080, P. R. China. E-mail:quyang@hlju.edu.cn

<sup>b</sup>.Key Laboratory for Photonic and Electronic Bandgap Materials, Ministry of Education, College of Chemistry & Chemical Engineering, Harbin Normal University, Harbin, 150025, China.E-mail:yanrui-1981@163.com

<sup>c</sup>.Federal Research Center, Boreskov Institute of Catalysis, 630090, Novosibirsk, Russia.

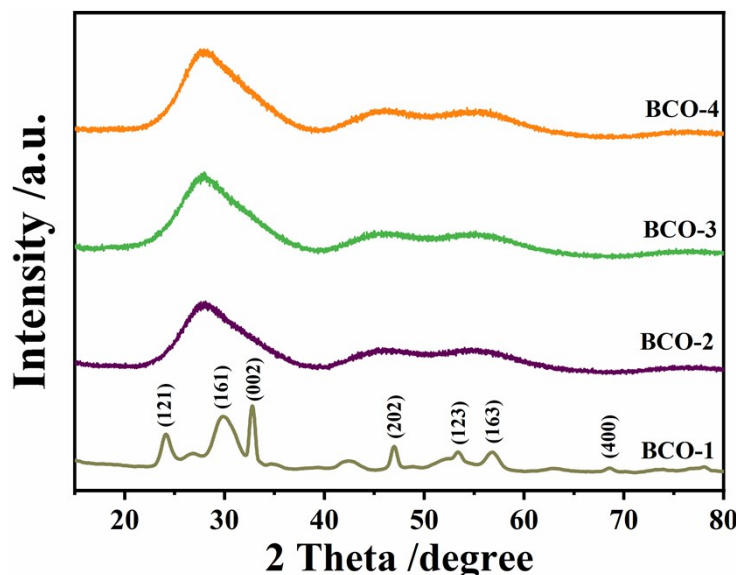

Figure S1. XRD patterns of different carbonates and bicarbonates treated CAU-17 samples.

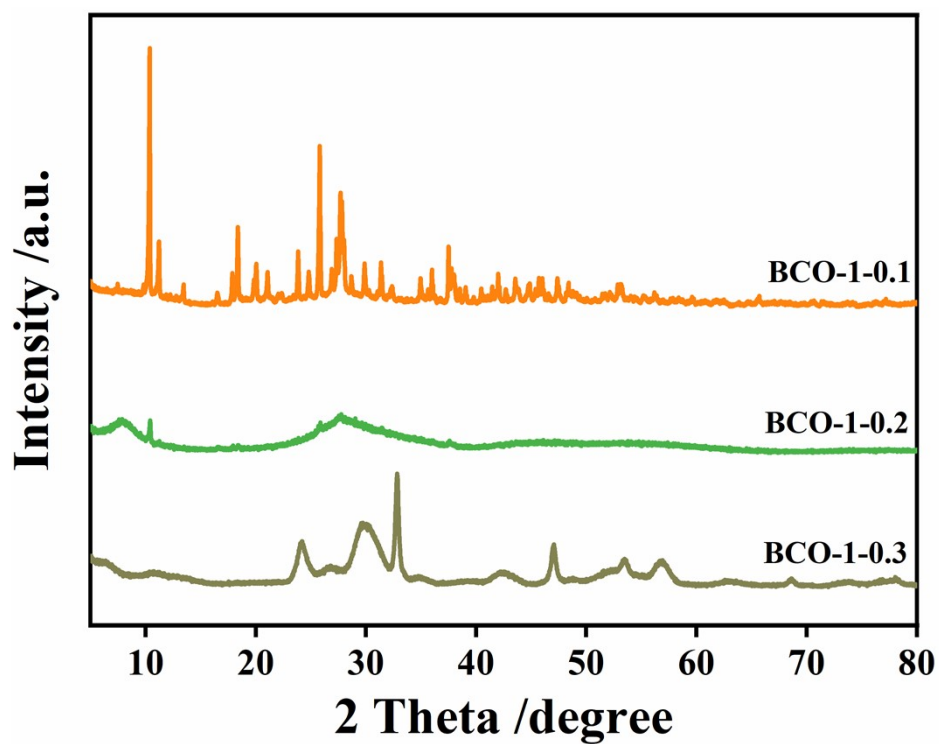

Figure S2. XRD patterns of different amounts of  $\text{KHCO}_3$  treated samples.

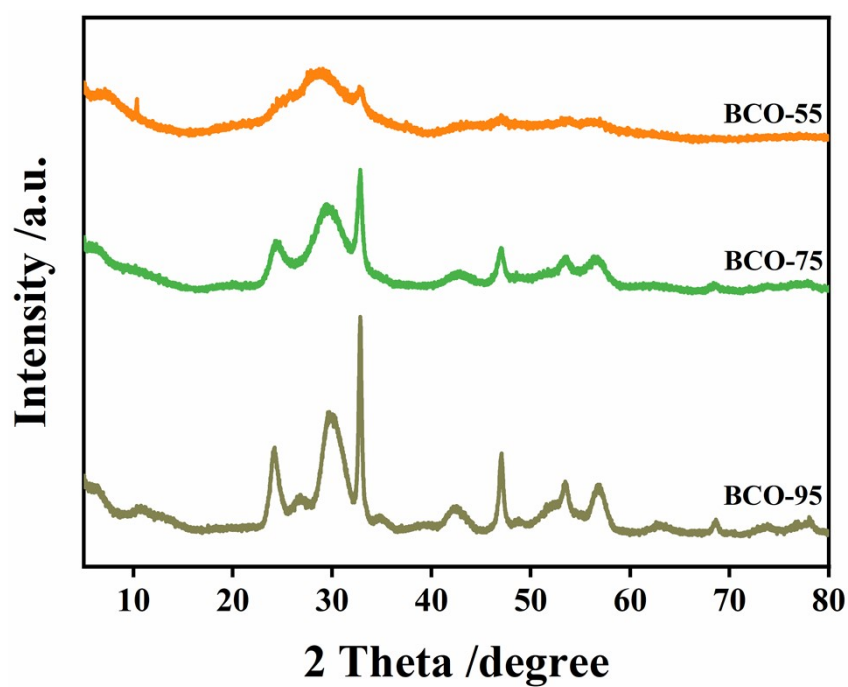

Figure S3. XRD patterns of samples obtained at different temperature in a water bath condition.

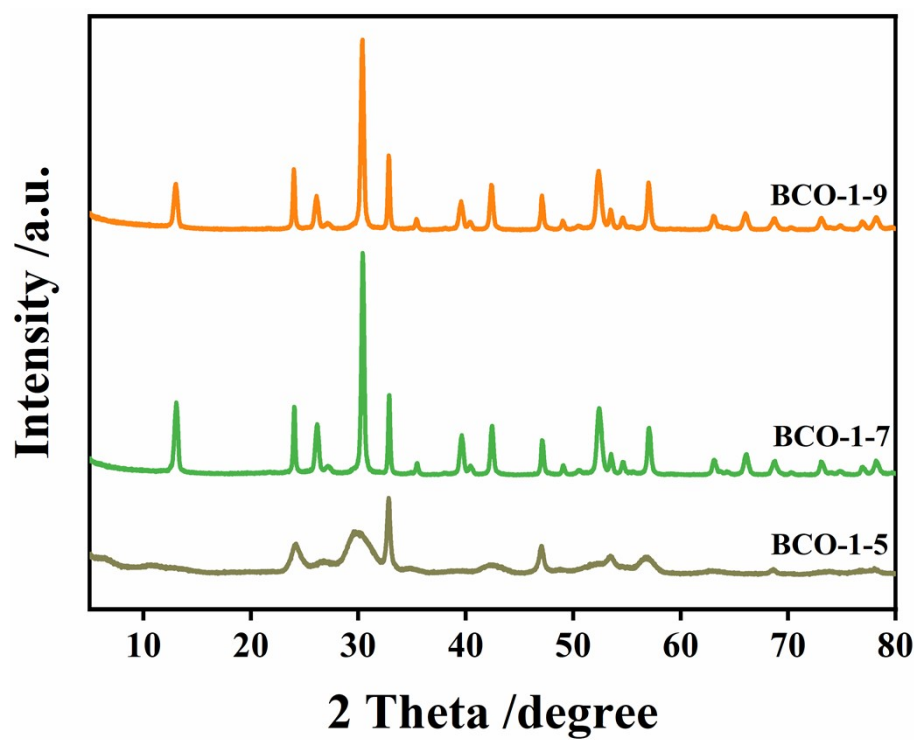

Figure S4. XRD patterns of samples obtained at different pH values at 95 °C water bath.

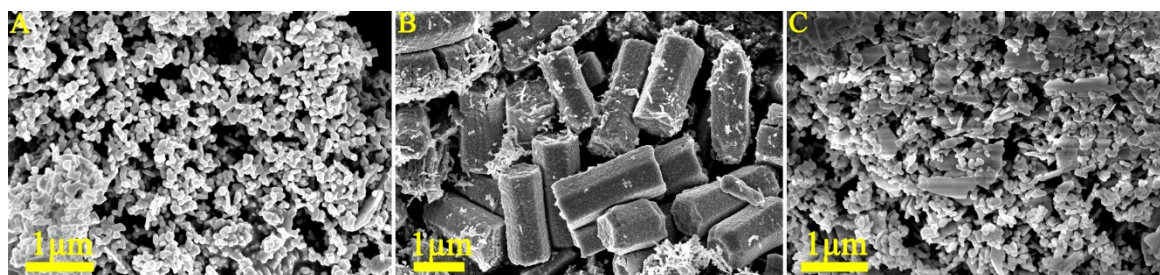

Figure S5. SEM images of samples obtained at pH values of 3 (A), 7 (B), and 9 (C) at 95 °C water bath .

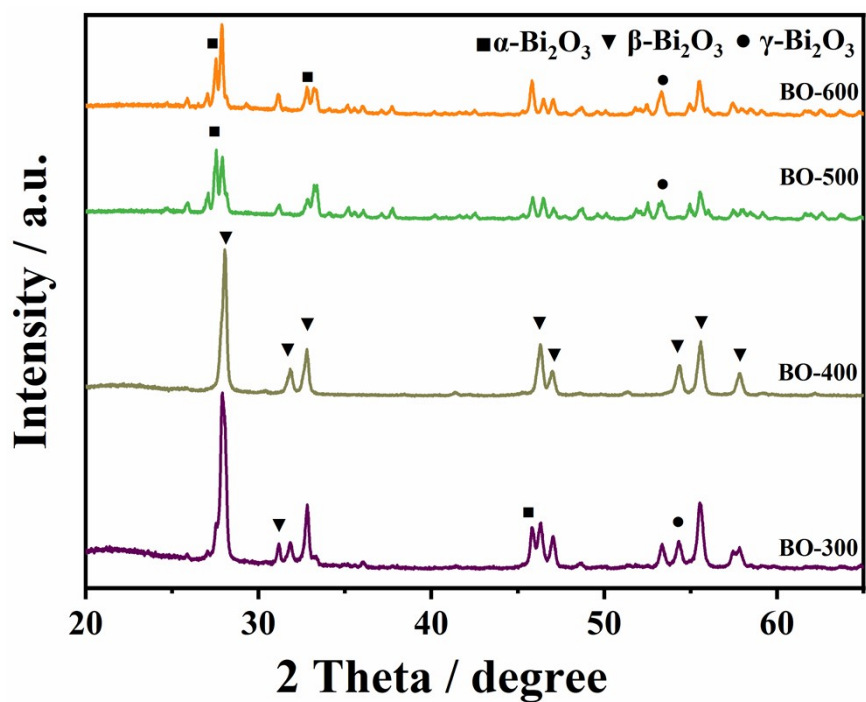

Figure S6. XRD patterns of the calcined BCO samples at different temperature.

Table S1. Surface area, total pore volume, and pore diameter of  $\alpha$ -BO and  $\beta$ -BO microrods from  $N_2$  adsorption-desorption.

| Sample       | Surface Area           | Total pore volume                         | Pore Diameter Dv(d) |
|--------------|------------------------|-------------------------------------------|---------------------|
| $\alpha$ -BO | 70.3 m <sup>2</sup> /g | $6.164 \times 10^{-2}$ cm <sup>3</sup> /g | < 5 nm              |
| $\beta$ -BO  | 85.1 m <sup>2</sup> /g | $1.021 \times 10^{-1}$ cm <sup>3</sup> /g | < 5 nm              |

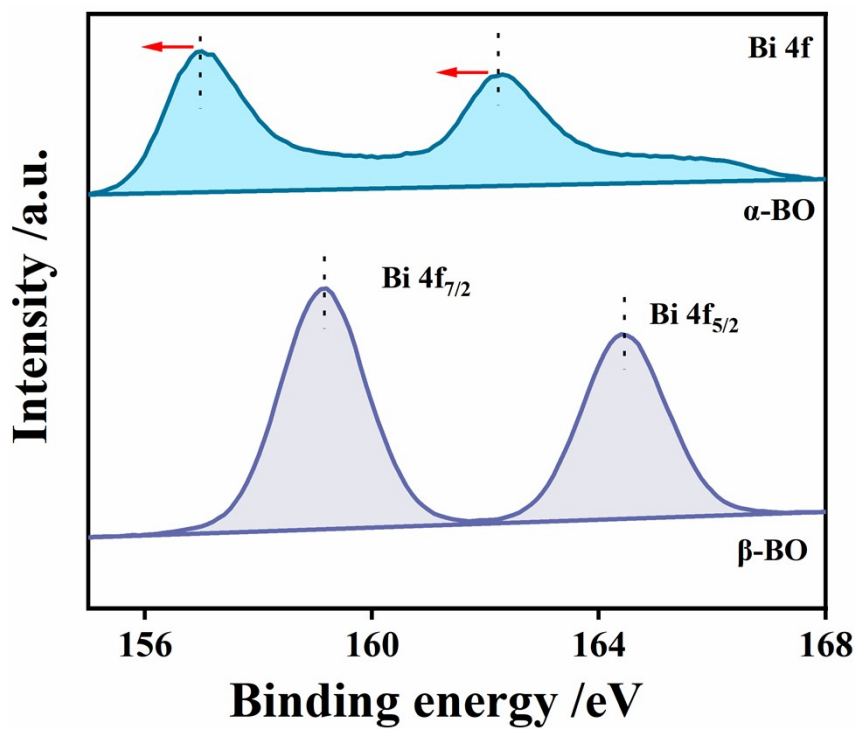

Figure S7 Bi4f XPS analysis of  $\alpha$ -BO and  $\beta$ -BO.

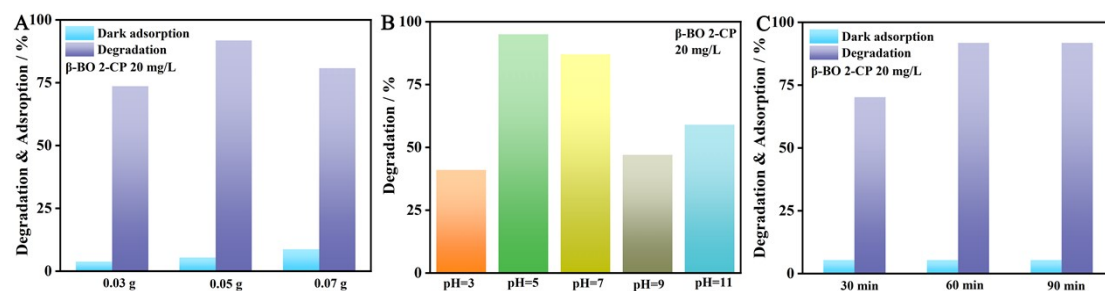

Figure S8. The influence of catalyst dosage (a), pH value (b), and reaction time (c) on degradation activities.

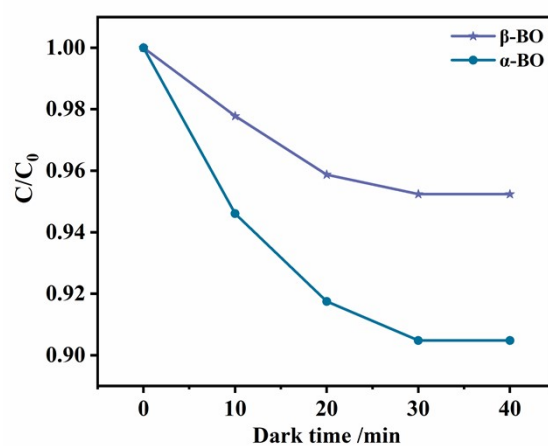

Figure S9. Time-dependent adsorption of 2-CP over  $\alpha$ -BO and  $\beta$ -BO.

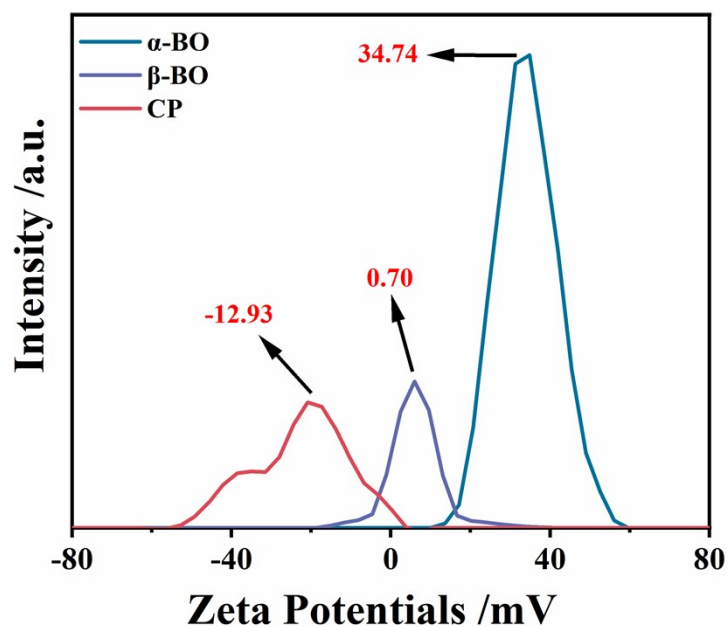

Figure S10. Zeta potentials of 2-CP,  $\alpha$ -BO, and  $\beta$ -BO microrods.

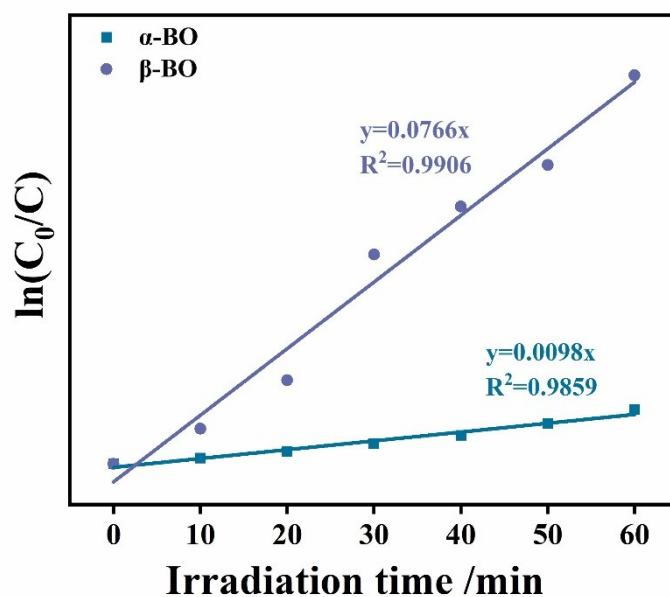

Fig. S11. First-order degradation kinetics ( $k$ ) of  $\alpha$ -BO and  $\beta$ -BO.

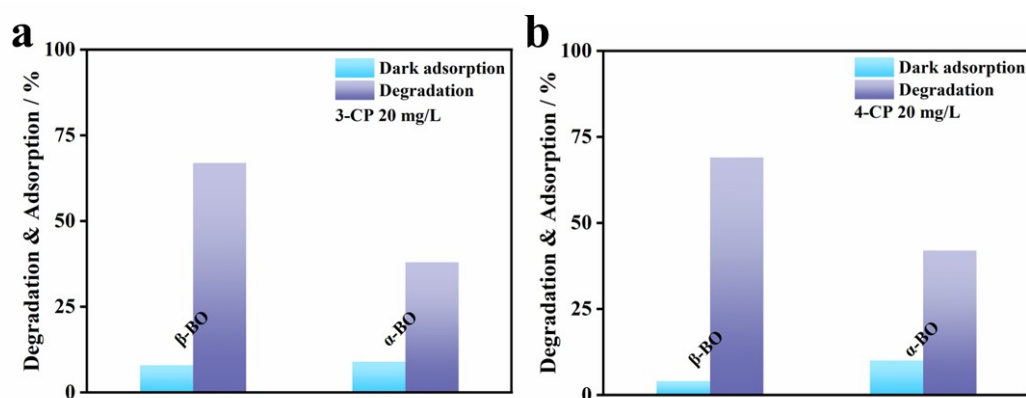

Figure S12. Visible-light activities of 3-CP (a) and 4-CP (b) degradation over  $\alpha$ -BO and  $\beta$ -BO.

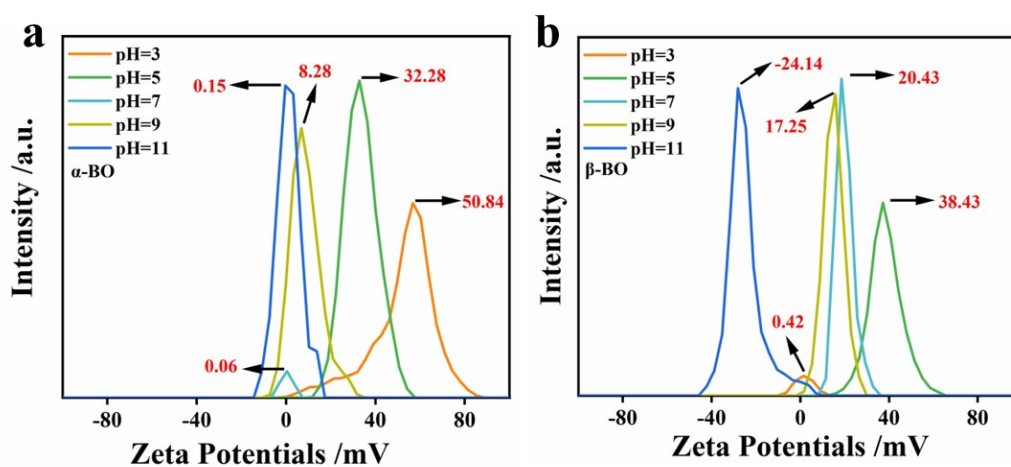

Figure S13. Zeta potentials of  $\alpha$ -BO (a) and  $\beta$ -BO (b) at different pH.

Table S2. Comparison of photocatalytic 2-CP degradation with different published work.

| Catalysts                                                          | Concentration<br>mg/L | Reaction<br>time/min | Degradation<br>rate/% | References                                                          |
|--------------------------------------------------------------------|-----------------------|----------------------|-----------------------|---------------------------------------------------------------------|
| BiO <sub>2-x</sub>                                                 | 20                    | 90                   | 75                    | Separation and<br>Purification<br>Technology, 2023, 316,<br>123792. |
| Bi <sub>2</sub> Fe <sub>4</sub> O <sub>9</sub> /BiFeO <sub>3</sub> | 20                    | 60                   | 65                    | Applied Catalysis B:<br>Environmental, 2022,<br>319, 121893.        |
| g-C <sub>3</sub> N <sub>4</sub> /CdS                               | 10                    | 60                   | 100                   | Applied Catalysis B:<br>Environmental, 2023,<br>324, 122276.        |
| Bi/Bi <sub>2</sub> O <sub>3</sub> /C                               | 10                    | 300                  | 70                    | ACS Applied Nano<br>Materials, 2019, 2,<br>2308.                    |
| β-Bi <sub>2</sub> O <sub>3</sub>                                   | 20                    | <60                  | 100                   | This work                                                           |
